# Supplementary material for: Cell-type-specific regulation of neuronal intrinsic excitability by macroautophagy
Source: eLife journal article supplement (doi:10.7554/elife.50843), 2020-01-08

# Full Length Blots corresponding to Figure 5--Fig. Supp 1H

**A** Kv1.2

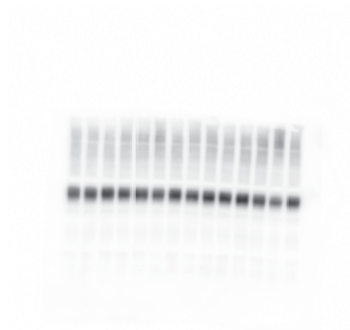

**B** PSD95

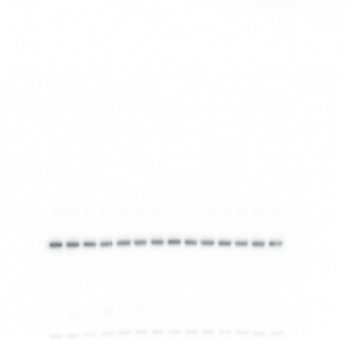

**C** Actin

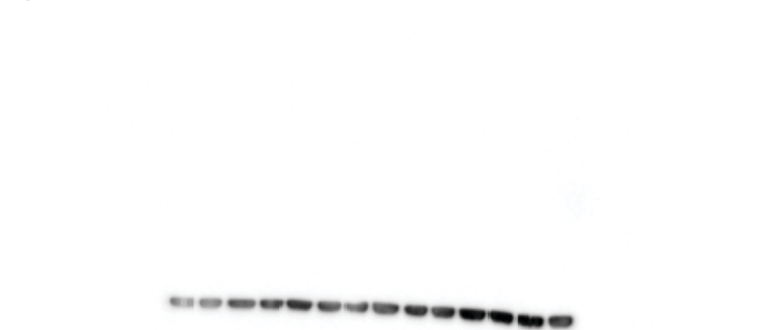

Supplement: fig5-figsupp1-data2 [file elife-50843-fig5-figsupp1-data2-v2.pdf]
