# Supplementary material for: Cell-type-specific regulation of neuronal intrinsic excitability by macroautophagy
Source: eLife journal article supplement (doi:10.7554/elife.50843), 2020-01-08

# Full Length Blots corresponding to Figure 5--Fig. Supp 2B

**A** Flag

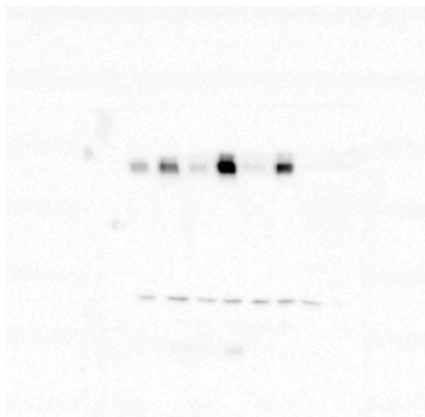

**C** LC3

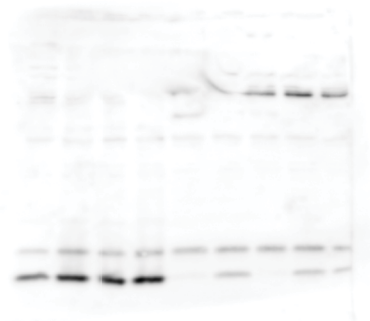

**B** Kir2.1

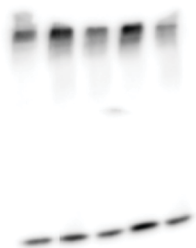

**D** Actin

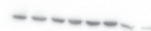

Supplement: fig5-figsupp2-data1 [file elife-50843-fig5-figsupp2-data1-v2.pdf]
