# Supplementary material for: Cell-type-specific regulation of neuronal intrinsic excitability by macroautophagy
Source: eLife journal article supplement (doi:10.7554/elife.50843), 2020-01-08

# Full Length Blots corresponding to Figure 5--Fig. Supp 2D

**A** Atg5<sup>WT</sup> Flag

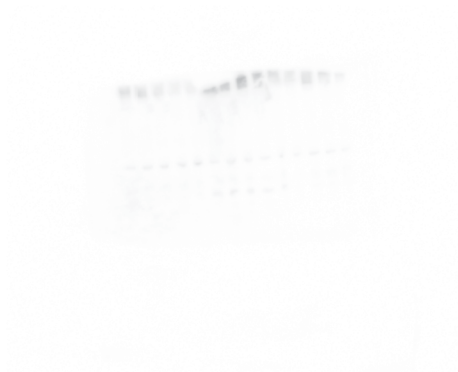

**C** Atg5<sup>KO</sup> Flag

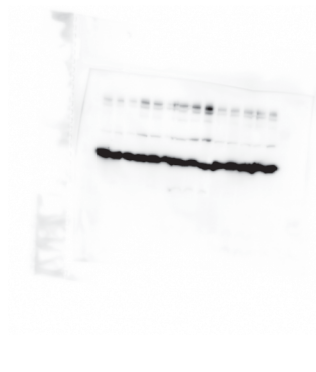

**B** Atg5<sup>WT</sup> Actin

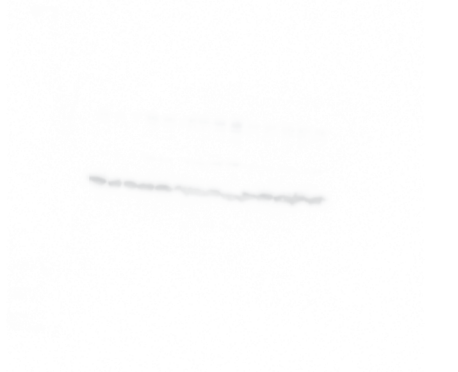

**D** Atg5<sup>KO</sup> Actin

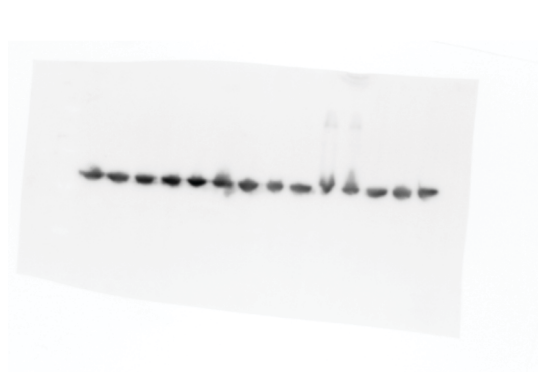

Supplement: fig5-figsupp2-data2 [file elife-50843-fig5-figsupp2-data2-v2.pdf]
