# Supplementary material for: Cell-type-specific regulation of neuronal intrinsic excitability by macroautophagy
Source: eLife journal article supplement (doi:10.7554/elife.50843), 2020-01-08

# Full Length Blots corresponding to Figure 7G-I

**A** PSD95

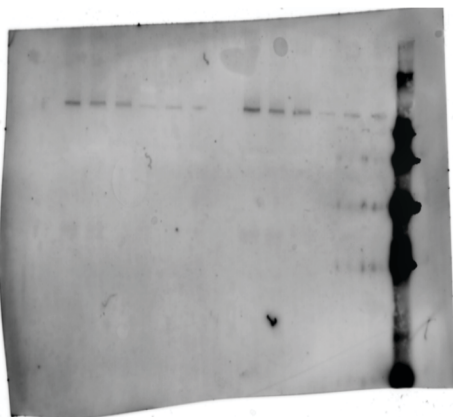

**B** DARPP32

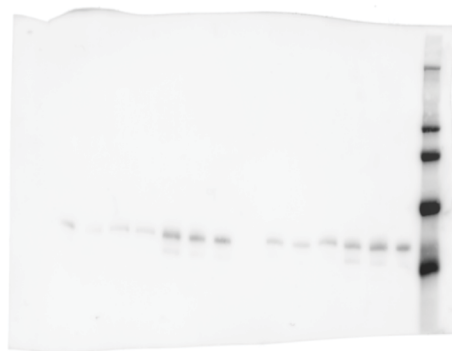

**C** Kir2.1

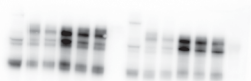

**D** Kir2.3

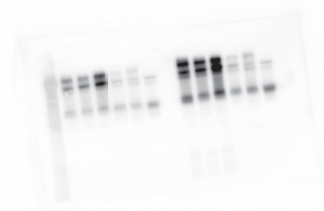

**E** p62

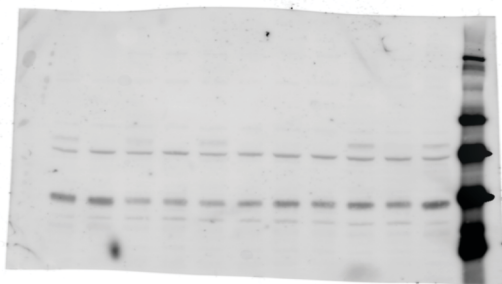

**F** Kv1.2

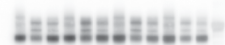

Supplement: fig7-data1 [file elife-50843-fig7-data1-v2.pdf]
