# Supplementary material for: Cell-type-specific regulation of neuronal intrinsic excitability by macroautophagy
Source: eLife journal article supplement (doi:10.7554/elife.50843), 2020-01-08

# Full Length Blots corresponding to Figure 8

**A** Ub

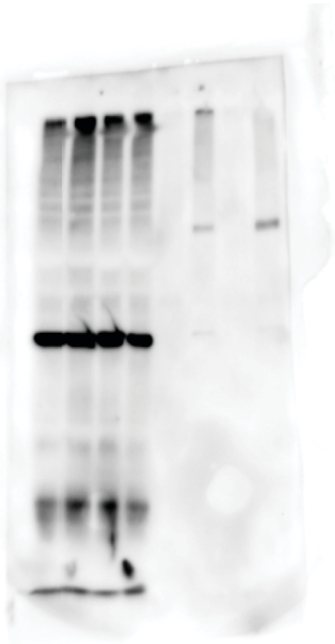

**B** AcLys

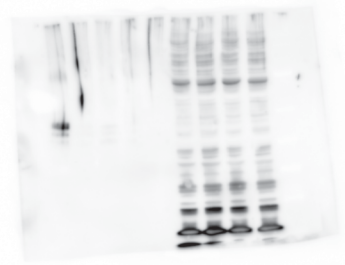

**C** Flag

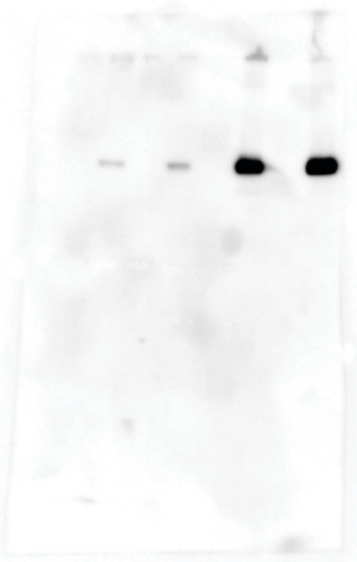

Supplement: fig8-data1 [file elife-50843-fig8-data1-v2.pdf]
