# Supplementary material for: Cell-type-specific regulation of neuronal intrinsic excitability by macroautophagy
Source: eLife. 2020 Jan 8;9:e50843. doi: 10.7554/eLife.50843 (PMC6984822; doi:10.7554/eLife.50843)
Supplement: Source data 1. [file elife-50843-data1.xlsx]

## Sheet: Figure 1
				D	p62+ cells / mm^2				E	p62+D1T+ / p62+			F	p62+D1T-/p62+			G	NeuN+ cells / mm^2				H	D1T+ cells / mm^2
					ctrl	dSPN Atg7cKO	iSPN Atg7cKO			dSPN Atg7cKO	iSPN Atg7cKO			dSPN Atg7cKO	iSPN Atg7cKO			ctrl	dSPN Atg7cKO	iSPN Atg7cKO			ctrl	dSPN Atg7cKO	iSPN Atg7cKO
					6.28741	767.064	484.131			0.770413	0.030525			0.131289	0.968139			1219.76	1288.92	1207.18			635.028	679.04	683.232
					0	446.406	521.855			0.642485	0.00666667			0.189103	0.992308			1156.88	1253.29	1320.36			622.454	708.382	685.328
					0	502.993	534.43			0.96	0.0163515			0.0232558	0.976021			1282.63	1236.52	1320.36			691.615	704.19	685.328
					48.8007	661.249	595.368			0.963113	0.0182008			0.179103	0.978139								653.929	558.768	745.024
					56.1208	856.452				0.939749				0.191318									810.091	732.01
					0	651.977				0.835402				0.172971									717.37	638.313

## Sheet: Figure 2
	A	Weight (g)							B	Latency to Fall (s)										C	Distance Travelled (cm)			D	Distance Travelled (cm)															E	Stereotypies (normalized)			F	Gropming bouts
		Male			Female				ctrl			dSPN Atg7cKO			iSPN Atg7cKO					ctrl	dSPN Atg7cKO	iSPN Atg7cKO		ctrl					dSPN Atg7cKO					iSPN Atg7cKO						ctrl	iSPN Atg7cKO			ctrl	iSPN Atg7cKO
		ctrl	dSPN Atg7cKO	iSPN Atg7cKO	ctrl	dSPN Atg7cKO	iSPN Atg7cKO		Trial 1	Trial 2	Trial 3	Trial 1	Trial 2	Trial 3	Trial 1	Trial 2	Trial 3			8349.9	11431.7	13036.3		10	20	30	40	50	10	20	30	40	50	10	20	30	40	50		1.07881	1.20076			0	3
		25	18.5	25.1	23.3	15.1	18.9		45	106	165	24	45	46	40	68	89			7299.39	6824.66	11872.4		2349.73	1861.56	1639.17	1420.42	1079.03	3043.45	2591.39	2142.9	2273.99	1379.99	2914.08	2395.71	2984.95	2163.12	2578.46		0.936775	1.06478			0	5
		28	20.6	26.8	20.6	18	19.2		28	96	96	42	65	179	40	79	101			6168.27	10738.2	10976.6		1643.08	1759.32	1520.65	1412.02	964.321	2025.43	1353.74	1359.47	918.946	1167.08	2312.29	2512.87	2792.31	2070.11	2184.78		1.03301	1.22909			2	7
		28.1	16	22.5	23.7	16.5	19.8		45	106	165	54	60	35	95	114	52			5545.38	6006.49	9275.42		1796.19	1367.6	895.62	1284.94	823.915	2425.27	2323.11	2346.05	1929.16	1714.62	1902.55	2222.34	2622.71	2560.25	1668.77		0.970057	1.03452			1	1
		24.9	21.9	26.1	19.5	15.8	21.6		59	150	237	18	42	68	72	70	105			6630.73	6512.43	8979.44		1385.84	1191.76	1197.62	949.917	820.24	2214.6	187.157	1226.25	1322.1	1056.38	1578.54	1842.94	1782.45	2016.96	2054.53		0.794149	1.00569			8	3
		25	25.2	25.3	21.4	16.4	21.4		104	165	149	85	69	81	31	86	152			10521.4	9155.1	7938.93		1773.16	1297.84	1407.71	1051.03	1100.99	2145.5	1488.34	1252.69	824.342	801.553	1917.96	1845.66	1385.77	1952.38	1877.68		1.11436	1.07562			2	3
		24.8	28.2	24.7	20.4	19.4	22.4		60	87	102	96	96	58	58	42	70			4102.08	5845.52	10389.8		2865.5	2436.77	2362.26	1763.26	1093.58	2090.14	2106.63	1765.59	1398.29	1794.45	1426.05	1533.56	1773.92	1411.19	1794.21		1.12781	1.00788			1	8
		24.5	23.2	27.4	22.5	17.9	20.3		92	100	231	40	76	66	112	123	128			5760.78	4144.36	10994.4		1090.09	1016.72	1034.04	338.03	623.191	1515.14	1474.17	994.721	1078.33	783.155	2085.4	2379.8	2001.46	1956.64	1966.52		0.999305	1.19211				1
		29.8	26.8	26.27	18.8	19	22.5		97	120	97	74	110	95	36	87	47			5651.95	5848.06	10702		1710.17	1121.88	1077.91	856.214	994.597	889.228	1054.71	958.742	855.264	386.407	2549.81	2912.98	2531.7	1496.44	1503.44		1.12428	0.939212			3	4
		26.8	26.5	20.32	20.1	22.1	17.73		67	169	160	67	51	76	41	31	38			6328.55	6356.93	11035		1563.93	996.781	882.835	1152.81	1055.59	1309.48	1405.73	910.281	1126.77	1095.8	2423.63	2076.25	2096.74	1588.94	2516.47			1.19622			3	10
		25.2	26	21.58	20.4	18	18.74		181	132	99	60	68	89	87	204	136			10312	7621.6	7776.11		1757.21	1468.86	1238.2	1163.64	700.643	1724.24	1430.91	1223.52	1050.53	927.726	1728.24	2161.03	1862.9	2761.74	2521.11		0.966527	1.18883			4	6
		24.9	28	23.53	20.3	18.2	21.84		80	86	103	40	67	67	96	92	57			9286.62	5843.99	8164.77		2122.81	2279.16	2113.85	2061.14	1735.07	1655.54	2057.85	1343.66	1542.63	1021.93	2137.39	1361.25	1560.47	1195.03	1521.96		1.00485	1.03805			2	4
		26.8	22.8	26.42	18.5		20.94		170	174	195	21	48	52	65	62	49			9260.4	10670.1	9891.37		1778.18	1982.87	1800.54	2073.35	1651.68	2136.27	1355.37	992.007	749.331	611.013	1530.54	1885.63	2031.63	1234.63	1482.34		0.987371				2	4
		23.8	20.3		17.1		18.47		70	124	96	14	9	8	154	114	24			10404.3	9744.98	8341.49		1740.3	1990.72	1973.88	1942.27	1613.23	1930.42	2218.41	2234.96	2076.66	2209.68	2144.5	2233.26	2176.73	1735.18	1601.69		0.980899	1.19295			3	5
		23.1	19.3		18.7				182	200	196	6	66	57	22	16	19			8635.14	9681.74			2085.99	2398.52	2718.01	1504.81	1696.96	2457.66	1470.84	1770.02	2635.22	1411.24	1821.45	2144.46	1313.41	1569.54	1492.63		0.860714	0.93501			2	1
		24.1	24.1		16.9				41	78	176	87	204	136	18	8	6			9704.58				3109.01	1516.19	1223.88	1387.13	1398.92	2132.36	2085.9	1991.87	1787.73	1683.88							1.02107	1.23245			3	8
		27.8	22.8		19				28	54	29	58	88	119	64	50	55			9947.94				2047.11	1973.34	1930.37	1568.57	2185.2													1.17236
		29.7	23.5		20.8				136	191	216	20	27	15	25	23	17			10473.5				1954.25	2126.43	1642.67	1901.3	2323.29																6	10
		26.3	18.8		20.9				90	70	101	48	80	110	69	85	70			8162.77				1943.96	1964.53	1948.97	2119.88	2496.2																4	12
		25	18.1		24.4				36	38	22	106	119	202	28	29	31			10354.3				1914.99	1725.33	1655.37	1494.5	1372.58																	5
		26.2			21.5				82	136	116	41	50	32	46	33	66			9430.3				1943.26	2586.66	1795.52	2268.25	1760.6																	11
		25.6			24.6				82	130	150	46	109	150	28	47	19			5328.5				2022.77	2131.04	2480.97	1571.89	1223.63																4	10
		32.6			20.5				85	153	108	28	96	96	21	47	9			10316.6				1212.18	1186.23	1121.96	992.352	815.774																5	7
		27.08			24.3				104	162	253	16	29	48	13	27	25			10513.7				2159.17	2089.49	2046.92	1850	2171.05																6	16
		24.79			21.8				123	109	77	11	61	101						7479.82				2268.98	2347.98	1879.66	2171.57	1845.49																3	8
		26.1			25.3				119	142	212	16	22	20						6444.4				1821.88	1878.44	1222.02	1421.03	1136.44																5	7
		27.06			24.6				51	67	106	26	38	20						6647.8				1915.99	1634.22	1102.36	1092.65	699.182																7	13
		28.9			25.26				57	185	228	44	31	38						9099				1674.42	1362.04	1464.45	1350.08	796.81
		27.3			23.27				209	234	238	115	89	86						8638.1				1902.31	2198.81	1967.19	1809.49	1221.2
		24.2			19.67				203	179	247	26	111	210						4752.1				2609.37	2195.43	1994.32	1079.41	759.569
		22.4			19.8				106	300	285	86	141	138						5739.02				1087.7	908.77	1100.63	944.372	710.619
		22.4			17.9				239	206	204	126	77	138						7537.2				1512.78	1586.61	1067.62	1085.14	486.871
									95	85	228	53	53	45										1424.06	1733.92	1654.12	1070.34	1654.75
									74	72	130	85	96	80
									122	151	165	64	64	80
									51	83	78
									30	74	132
									83	66	135
									86	107	104
									24	78	122
									47	68	122
									93	135	151
									57	67	97
									73	59	133
									26	40	36
									97	115	97
									56	102	133
									69	60	108
									88	67	140
									52	102	116
									56	108	130

## Sheet: Figure 3
	C	Total dendritic length (um)					D	Sholl Analysis (crossings)
	dSPN		iSPN				dSPN																																						iSPN
	ctrl	dSPNAtg7cKO	ctrl	iSPNAtg7cko			Ctrl																			dSPNAtg7cKO																			Ctrl
	2671.36	2833.19	2286.23	2271.09		Distance from soma (um)	10	20	30	40	50	60	70	80	90	100	110	120	130	140	150	160	170	180	190	10	20	30	40	50	60	70	80	90	100	110	120	130	140	150	160	170	180	190	10	20	30	40	50
	1946.25	1904.63	2977.38	2706.39			6	11	10	18	20	20	22	21	14	15	12	7	6	3	2	0	0	0	0	6	8	16	16	17	18	20	21	21	16	15	15	11	7	4	3	2	1	0	5	10	19	21	22
	2554.3	2194.29	2077.18	2285.33			4	8	10	13	14	18	9	6	6	7	8	7	4	4	2	2	1	1	1	7	9	12	14	15	13	13	11	11	11	9	4	6	2	1	0	0	0	0	7	17	22	29	27
	2613.13	1576.15	2511.46	2618.1			6	11	19	21	19	20	17	19	18	16	11	3	3	1	1	1	1	0	0	6	11	15	13	16	15	14	14	14	12	11	9	7	4	3	3	2	1	0	3	5	11	14	18
	2496.63	2202.89	3188.95	1795.21			7	9	10	12	16	17	18	15	14	13	6	4	2	2	1	0	0	0	0	5	5	7	10	10	12	12	9	11	9	6	5	6	3	2	1	0	0	0	5	10	12	14	18
	2087.6	2335.58	3426.8	2153.78			4	10	17	20	22	22	25	21	20	16	13	8	7	3	3	0	0	0	0	7	13	17	16	16	17	17	16	15	11	9	8	5	3	3	2	1	0	0	5	10	15	16	19
	2264.35	1501.43	2627.86	2439.46			11	17	22	25	22	19	22	20	18	14	9	7	2	1	0	0	0	0	0	5	9	15	17	19	21	17	15	15	13	9	6	1	1	1	1	1	0	0	7	9	10	12	16
	2385.99	1487.01	3083.26	2996.42			9	15	17	18	22	22	22	19	17	11	6	3	2	1	1	0	0	0	0	10	9	16	16	17	14	10	7	4	2	2	1	1	0	0	0	0	0	0	7	13	14	19	19
	2573.17	3061.61	2620.95	2350.32			6	13	16	18	20	19	16	16	15	15	13	12	9	7	3	2	2	0	0	4	6	9	11	11	12	13	12	8	6	4	3	2	2	2	1	1	0	0	9	14	21	22	22
	2310.39	2607.26	2003.42	3067.26			10	18	21	24	21	19	16	17	14	11	7	6	3	1	1	0	0	0	0	7	16	19	22	24	26	24	22	17	11	5	1	0	0	0	0	0	0	0	5	11	10	10	13
	3235.12	2599.75	2428.35	2478.4			4	9	13	14	23	19	19	16	13	13	6	3	2	2	1	0	0	0	0	6	15	20	26	27	24	23	17	12	7	2	2	0	0	0	0	0	0	0	10	13	16	12	18
	2888.84	2314.25	2451.08	2958.17			7	12	12	15	16	16	14	14	11	10	8	6	5	1	0	0	0	0	0	6	16	23	23	23	19	17	16	13	10	6	2	0	0	0	0	0	0	0	8	13	17	19	21
	2100.21	1612.81		2900.1			8	7	10	12	13	15	15	11	12	12	10	10	8	6	4	2	0	0	0	7	10	17	16	18	15	14	11	8	6	4	1	0	0	0	0	0	0	0	6	11	11	14	14
	2811.36			2490.23			6	11	13	17	16	17	17	16	14	14	11	8	4	1	0	0	0	0	0																				7	10	19	22	23
	2597.23			2414.86			6	11	15	17	21	21	21	17	14	12	10	7	4	2	2	0	0	0	0
	2434.61			3009.61			12	15	23	28	29	26	25	23	23	20	22	17	9	6	5	3	2	0	0
	2651						6	11	15	18	24	24	23	24	20	21	19	14	12	9	5	3	1	1	0
	2257.11						6	12	15	21	21	18	19	13	15	8	5	2	1	1	0	0	0	0	0
	2798.05						2	10	14	19	19	20	23	22	18	15	15	10	7	4	1	2	1	0	0
	3455.64						6	12	18	28	33	30	30	26	23	21	15	8	4	3	1	1	1	0	0
	2715.78						3	11	15	18	23	24	22	20	18	16	10	8	5	4	1	0	0	0	0
	3129.48						9	11	13	17	23	29	28	29	21	19	14	8	3	3	2	1	0	0	0
	2948.11						10	18	25	24	24	24	23	21	16	13	10	8	3	0	0	0	0	0	0
[truncated: 53 more columns]

## Sheet: Figure 4
	B	RMP (mV)		C	Rin (M𝛺)		D	Rheobase (pA)		E	Capacitance (pF)			F	FI curve (APs/500 msec)																									H	Kir current density (pA/pF)
	ctrl	iSPN Atg7cKO		ctrl	iSPN Atg7cKO		ctrl	iSPN Atg7cKO		ctrl	iSPN Atg7cKO			ctrl												iSPN Atg7cKO														ctrl
	-73.67	-76.57		166.957	304.54		162.92	72.74		43.3471	63.7293		Current step (pA)	0	20	40	60	80	100	120	140	160	180	200	220	0	20	40	60	80	100	120	140	160	180	200	220		Voltage step (mV)	-50	-60	-70	-80	-90	-100	-110	-120	-130	-140
	-78.02	-76.98		173.569	220.998		141.08	88.08		74.7819	106.005			0	0	0	0	0	0	1	6	13	17	23	22	0	0	0	0	2	7	9	14	15	19	23	22			0.2237	0.318488	0.257824	0.064456	-0.29574	-0.86826	-1.95643	-3.84461	-6.63138	-10.04
	-77.47	-74.39		148.519	215.657		109.08	74.1		80.7721	65.4505			0	0	0	0	0	0	1	4	6	8	11	12	0	0	0	0	3	8	12	14	8	4	3	2			0.843929	1.1668	1.28507	1.39696	1.0677	-0.421964	-2.53818	-5.11472	-7.74241	-10.1208
	-79.42	-79.3		122.452	169.118		135.16	178.04		98.0641	44.5776			0	0	0	0	0	0	0	0	0	2	6	8	0	0	3	9	21	9	4	5	3	3	2	2			0.0887407	0.213784	0.254121	0.108909	-0.258155	-1.12136	-2.71466	-5.15503	-8.21255	-10.9433
	-77.42	-66.07		225.321	176.748		94.18	22.94		58.1022	67.3279			0	0	0	0	0	1	4	7	9	11	13	14	0	0	0	0	0	0	0	0	3	11	15	16			0.702708	0.606884	0.755943	0.362001	-0.68141	-2.78954	-7.38908	-13.6709	-20.2721	-26.2131
	-75.06	-67.08		171.916	258.636		164.96	81.26		80.3361	89.2931			0	0	0	0	0	0	1	5	8	12	17	16	0	0	4	10	14	16	16	17	17	17					0.954949	1.23432	0.995585	0.807643	0.132067	-1.58481	-5.21666	-10.3216	-16.5592	-22.3956
	-81.89	-63.69		163.396	185.903		156.86	81.26		43.0369	90.4164			0	0	0	0	0	0	0	2	7	9	11	16	0	0	0	0	0	2	6	7	15	16	22	32			-0.04248	0.017699	0.099117	0.063718	-0.0708	-1.21064	-3.49386	-7.00542	-11.2922	-14.9737
	-79.32	-74.33		199	150.299		141.36	60.4		79.4511	45.4046			0	0	0	0	0	0	0	3	7	11	14	32	0	0	0	0	0	0	0	0	0	0	1	3			-0.24458	-0.05755	0.18224	0.369275	-0.14867	-1.76005	-4.06682	-7.51978	-12.9534	-20.1327
	-83.3	-78.64		137.075	293.732		119.62	104.96		98.1608	68.8038			0	0	0	0	0	0	0	0	0	4	13	14	0	0	0	0	0	0	0	0	0	0	0	0			3.4779	4.35089	4.81555	5.069	4.4565	2.31625	-0.21825	-3.5131	-6.82907	-10.2506
	-79.74	-76.29		100.326	265.503		146.78	104.3		97.5791	90.6812			0	0	0	0	0	0	0	0	0	0	1	4	0	0	0	0	0	2	5	8	10	12	17	17			2.94639	2.46077	1.88945	0.914116	-0.62437	-3.09738	-5.86422	-9.69616	-13.0629	-16.246
	-80.8	-77.41		149.155	185.521		158.66	106		138.703	72.4992			0	0	0	0	0	0	0	0	0	0	2	4	0	0	0	0	0	4	7	10	12	14	18	17			-0.69519	0.381601	0.914332	0.668747	-0.09823	-2.1876	-5.28952	-8.83728	-12.5059	-16.0046
	-74.54	-77.39		163.778	106.049		206.74	98.18		28.6628	44.2225			0	0	0	0	0	0	0	0	0	0	0	0	0	0	0	0	5	9	12	16	18	19	33	6			0.749341	0.602042	0.64173	0.236025	-0.442803	-1.71459	-3.46835	-5.59457	-7.50066	-9.83077
	-77.1	-71.58		121.18	211.334		156.34	106.9		60.0797	49.4825			0	0	0	0	2	6	11						0	0	0	0	2	6	9	11	14	14	25	16			0.262113	0.444452	0.459647	0.448251	-0.44445	-2.20327	-4.84339	-7.98115	-11.1037	-14.2111
	-82.18	-74.71		171.026	234.858		138.48	142.1		86.2108	86.1001			0	0	0	0	0	0	0	1	5	7			0	0	0	0	0	0	0	0	0	2	5	7			0.531827	0.82256	0.496372	0.290732	-0.8722	-3.05623	-6.7223	-10.7358	-14.8841	-18.9543
	-81.5	-75.71		245.285	158.946		164.26	104.96		63.6343	29.6464			0	0	0	0	0	0	0	0	2	5	7	8	0	0	0	2	6	12									0.451585	0.415816	0.420287	0.0536537	-0.250384	-1.19379	-2.98672	-5.18652	-7.71272	-10.1763
	-74.11	-62.56		167.847	235.113		131.16	118.76		80.4889	47.8775			0	0	0	0	0	0	0	1	3	6	8	9	0	0	0	0	0	0	0	0	0	0	2	5			0.441469	0.929572	1.46742	1.70059	1.24979	-0.81765	-3.339	-6.2272	-9.10918	-12.3164
	-82.18	-80.22		121.689	124.232		181.14	122.32		95.4659	86.1498			0	0	0	0	0	2	5	7	8				0	0	0	0	0	0	0	0	2	5	7	9			0.128226	0.465993	0.497268	0.262708	-0.58796	-2.47696	-4.92577	-7.89061	-10.9868	-13.961
	-75.06	-79.18		181.325	176.366		176.02	74.6		70.5664	82.5449			0	0	0	0	0	0	0	0	0	1	3	5	0	0	0	0	1	6	9	8	12	10					0.191418	0.330031	0.310229	0.173816	-0.66226	-2.1408	-4.50602	-7.29588	-10.3916	-13.3751
	-77.91	-72.75		160.675	249.608		243.04	198		85.2316	82.7289			0	0	0	0	0	0	0	2	5	7	8		0	0	0	0	0	0	0	0	0	2	4	5
	-72.75	-75.32		176.62	118.001		159.86	72.28		77.7426	80.2083			0	0	0	0	0	0	0	5	8	9	11	13	0	0	0	0	2	7	9	12
	-76.154	-75.53		203.832	103.505		163.42	139.8		85.0873	72.0046			0	0	0	0	0	0	0	1	3	5	7	8	0	0	0	0	0	0	0	1	6	7	9	7
	-76.03	-69.18		130.59	264.358		176.36	177.34		43.7756	59.1686			0	0	0	0	0	0	0	4	6	8	10	11	0	0	0	0	2	6	9	12
	-80.64	-78.66		106.176	131.607		165.82	255.68		51.9586	94.9375			0	0	0	0	0	0	0	0	4	7	10	11	0	0	0	0	0	1	4	6	8	9	11
	-75.76	-82.67		98.0377	90.6626		207.96	121.6		80.6096	79.5688			0	0	0	0	0	2	6	9	11	12	13	14	0	0	0	0	0	0	0	0	0	4	6	8
	-80.58	-70.94		309.499	261.052		278.26	124.52		61.2376	67.2376			0	0	0	0	0	0	0	0	3	6	9	11	0	0	0	0	0	6	10	13	15	16	18	18
	-76.63	-74.48		135.93	337.346		220.76	93.82		115.356	52.3336			0	0	0	0	0	0	0	0	0	4	8	9	0	0	0	0	0	0	5	9	11	13	13	15
	-74.3	-66.09		132.116	330.226			109.48		75.3771	68.8163															0	0	0	0	0	5	8	10	11	13	14	15
	-77.27	-73.76		170.771	161.997			184.4		81.6718	109.626															0	0	0	0	0	0	0	0	0	1	5	7
	-77.67	-73.26		127.538	362.142			61.56		82.7828	84.781															0	0	0	0	0	2	6	11	13	14	16	17
	-81.88	-72.05		175.222	239.181			165.6		52.9994	42.4367															0	0	0	0	0	0	0	1	5	8	10	11
	-75.12	-69.84		156.275	209.681			144.16		52.3207	41.1705															0	0	0	0	0	0	1	6	8	9	11	12
	-71.75	-80.03		170.39	127.919			75.06		67.0579	87.5112															0	0	0	0	0	0	0	4	7	10	12	13
	-76.58	-78.57			119.273			170.52		76.1034	82.5352															0	0	0	0	0	0	1	4	7	10	12	14
	-72.43	-67.12			268.428			77.02			51.4651															0	0	0	0	0	0	0	0	3	6	9	10
		-78.29			273.387			79.54			75.5591															0	0	0	0	0	0	3	8	10	12	14	14
		-73.47			264.486			153.72			37.4574															0	0	0	0	0	0	1	4	6	8	9	10
		-72.39			295.512			106.36			48.29															0	0	0	5	8	10	12	12	12	12	12	12
		-75.91			289.027						54.8025
											55.9086
[truncated: 12 more columns]

## Sheet: Figure 4 - Fig Supp 1
		D	ACSF-Kir2 Current (pA)																							E	Ba-Kir2 Current (pA)
		ctrl											iSPNAtg7cKO													ctrl											iSPNAtg7cKO
	Voltage step (mV)	-150	-140	-130	-120	-110	-100	-90	-80	-70	-60	-50	-150	-140	-130	-120	-110	-100	-90	-80	-70	-60	-50		Voltage step (mV)	-50	-60	-70	-80	-90	-100	-110	-120	-130	-140	-150	-50	-60	-70	-80	-90	-100	-110	-120	-130	-140	-150		Voltage step (mV)
		-1034.24	-808.105	-533.752	-309.448	-157.471	-69.8853	-23.8037	5.18799	20.752	25.6348	18.0054	-942.688	-744.629	-528.87	-321.35	-158.691	-46.9971	1.2207	22.8882	11.5967	21.9727	12.5122			5.18799	-83.6182	-153.198	-221.252	-271.301	-299.988	-345.154	-377.197	-415.039	-448.914	-479.126	127.869	48.8281	-36.3159	-86.9751	-138.245	-181.274	-218.811	-236.511	-281.372	-293.274	-317.383
		-1012.57	-777.893	-549.622	-290.833	-65.6128	84.5337	168.457	176.392	162.659	132.751	82.7026	-882.263	-703.125	-488.892	-311.279	-176.392	-67.749	-18.9209	-2.13623	3.05176	12.8174	7.32422			80.8716	5.79834	-48.8281	-95.52	-125.427	-161.438	-209.351	-212.402	-242.31	-285.339	-366.516	59.5093	15.564	-11.2915	-46.0815	-81.1768	-118.408	-151.062	-169.983	-187.988	-215.759	-234.985
		-941.162	-661.621	-408.63	-156.86	45.7764	186.768	217.59	184.631	124.512	75.6836	1.52588	-1608.89	-1269.23	-864.258	-495.605	-222.778	-61.9507	5.79834	16.7847	3.96728	-6.10352	-16.4795			242.31	112	6.10352	-63.1714	-112.915	-137.634	-155.029	-173.34	-201.111	-228.882	-236.206	81.1768	37.5366	3.66211	-22.583	-54.6265	-83.6182	-103.149	-122.375	-145.569	-162.659	-184.631
		-1006.47	-830.688	-602.722	-350.342	-166.016	-72.3267	-10.9863	5.18799	19.5312	15.2588	14.6484	-554.504	-450.134	-261.841	-135.803	-69.2749	-32.6538	-9.76563	8.8501	14.3433	14.3433	1.83106			219.421	106.812	11.2915	-74.7681	-149.231	-217.285	-268.25	-311.584	-339.355	-387.268	-423.279	67.749	-25.9399	-152.588	-230.408	-349.426	-446.167	-511.475	-599.976	-639.954	-666.809	-669.556
		-893.25	-751.343	-581.055	-391.846	-211.792	-79.9561	-19.5313	10.376	21.6675	17.395	20.1416	-888.062	-759.583	-600.891	-403.442	-231.323	-115.051	-58.8989	-35.7056	-30.2124	-16.4795	-11.2915			150.146	71.4111	-4.57764	-71.106	-129.7	-171.509	-213.623	-242.004	-261.841	-281.677	-304.565	77.8198	35.4004	7.93457	-30.2124	-73.8525	-130.31	-190.125	-234.68	-255.432	-269.775	-286.255
		-1506.65	-1243.29	-926.819	-618.591	-353.394	-154.724	-35.4004	24.1089	29.2969	29.2969	-11.9019	-1607.67	-1327.21	-981.14	-661.621	-345.764	-150.757	-43.6401	-11.9019	-5.79834	-11.5967	-16.1743			92.7734	18.9209	-38.147	-99.1821	-145.569	-191.65	-227.051	-263.977	-297.241	-334.167	-356.445	38.7573	12.5122	-10.0708	-36.6211	-65.918	-107.422	-140.076	-170.593	-182.8	-192.261	-209.351
		-1651.92	-1290.89	-973.511	-603.943	-301.208	-104.37	-6.10352	5.49316	8.54492	1.52588	-3.66211	-1034.55	-845.337	-621.643	-396.729	-187.988	-45.4712	0.915527	7.62939	-5.49316	-11.9019	-20.4468			62.2559	8.54492	-20.1416	-59.8145	-102.539	-142.517	-171.509	-191.65	-214.539	-228.882	-247.803	160.522	78.7354	-6.40869	-74.1577	-128.174	-186.768	-220.947	-252.075	-291.443	-320.435	-344.238
		-1607.06	-1281.13	-824.28	-478.516	-258.789	-112	-9.46045	23.4985	11.5967	-3.66211	-15.564	-523.682	-367.737	-224.915	-105.896	-28.3813	5.79834	16.7847	23.8037	9.46045	-10.9863	-34.4849			97.9614	54.3213	21.3623	-12.8174	-61.3403	-116.577	-156.86	-190.125	-220.642	-253.601	-281.067	46.0815	17.0898	-7.01904	-25.0244	-38.4521	-51.8799	-65.0024	-69.5801	-75.9888	-87.8906	-96.1304
		-1391.91	-1214.9	-976.868	-725.098	-438.538	-231.628	-46.6919	68.3594	141.296	184.021	220.337	-620.728	-381.775	-210.266	-109.253	-64.0869	-6.10352	11.2915	18.9209	14.6484	2.13623	1.83106			177.612	39.0625	-88.501	-187.683	-279.236	-307.922	-348.206	-407.104	-467.224	-500	-500	103.149	35.0952	-8.8501	-39.3677	-64.6973	-83.6182	-101.624	-113.831	-127.563	-141.907	-159.607
		-1543.88	-1292.72	-1010.13	-713.806	-427.246	-176.697	-7.93457	54.0161	73.8525	30.8228	-56.1523	-1191.1	-908.203	-626.526	-333.862	-155.029	-53.4058	-0.30518	13.4277	3.05176	-8.54492	-24.1089			235.596	115.356	14.0381	-72.6318	-143.127	-197.144	-243.835	-281.982	-318.909	-357.971	-402.527	136.719	57.6782	-18.3105	-76.9043	-132.751	-200.5	-257.263	-293.579	-327.148	-351.562	-389.404
		-1057.43	-862.427	-668.64	-460.51	-264.282	-108.643	-25.3296	18.9209	25.9399	-0.305176	-17.0898	-1276.25	-1050.42	-801.697	-553.589	-331.421	-164.795	-59.8145	-18.9209	-6.10352	-23.1934	-19.5312			275.574	147.095	44.2505	-60.1196	-149.536	-248.108	-318.604	-379.639	-415.649	-466.309	-571.899	252.075	146.179	59.8145	-16.1743	-69.2749	-119.324	-151.367	-172.424	-191.345	-213.013	-232.239
		-1028.75	-818.176	-610.962	-408.936	-227.051	-88.501	3.35693	38.4521	34.1797	-7.62939	-20.752	-914.917	-752.563	-564.575	-393.982	-229.187	-91.5527	-17.7002	20.752	19.5312	-21.3623	-62.8662			133.057	64.0869	5.79834	-57.9834	-142.517	-232.849	-316.162	-346.68	-305.176	-262.451	-255.432	188.599	88.1958	15.564	-43.0298	-109.253	-151.062	-213.013	-323.792	-373.84	-474.243	-476.99
		-1406.25	-1141.66	-892.029	-641.174	-389.099	-177.002	-35.7056	36.0107	36.9263	35.7056	21.0571	-775.146	-565.186	-463.257	-315.247	-231.018	-122.07	-15.8691	13.4277	51.5747	58.2886	38.4521			134.888	-2.44141	-127.258	-242.615	-359.497	-464.478	-545.349	-567.017	-563.049	-569.763	-569.763	209.656	124.512	39.3677	-45.7764	-129.089	-217.285	-297.241	-354.004	-395.203	-419.312	-658.875
		-956.726	-815.735	-640.564	-462.036	-289.307	-131.531	-37.5366	12.5122	21.3623	35.4004	22.8882	-712.585	-774.231	-570.068	-382.08	-207.825	-90.332	2.44141	30.8228	38.147	44.5557	69.8853			190.125	51.2695	-63.4766	-184.631	-312.805	-417.175	-487.061	-531.006	-541.687	-571.594	-568.542	126.038	59.8145	21.0571	-43.6401	-103.76	-183.105	-236.511	-259.705	-240.479	-213.928	-210.571
		-870.056	-694.58	-526.428	-354.004	-203.857	-81.4819	-17.0898	3.66211	28.6865	28.3813	30.8228	-598.45	-437.622	-279.236	-121.155	-16.7847	104.065	169.373	158.081	164.795	116.577	93.3838			105.286	52.7954	-3.66211	-54.9316	-124.207	-204.468	-278.931	-292.358	-259.094	-242.004	-285.95	46.0815	4.27246	-26.8555	-62.2559	-115.967	-179.443	-230.408	-249.939	-258.179	-229.187	-233.765
		-1546.51	-1208.98	-894.165	-611.267	-327.759	-80.2612	122.681	166.931	144.043	91.2476	43.335	-659.485	-532.227	-378.723	-248.108	-142.212	-65.3076	-13.1226	3.05176	3.96729	10.376	5.79834			98.5718	58.5938	10.376	-31.1279	-76.5991	-127.869	-156.86	-143.433	-132.751	-127.563	-118.713	244.141	157.471	60.73	-30.2124	-134.888	-278.931	-393.982	-435.181	-384.216	-300.293	-261.841
		-1665.34	-1362.3	-1072.08	-769.958	-480.652	-241.699	-57.373	25.6348	48.5229	45.4712	12.5122	-586.243	-468.14	-337.83	-214.539	-113.831	-38.147	1.83105	10.0708	2.44141	10.376	3.66211			128.174	67.749	21.3623	-33.2642	-88.501	-155.64	-199.89	-207.214	-178.528	-166.626	-198.975	135.498	83.6182	34.1797	-14.6484	-71.7163	-142.517	-215.149	-268.86	-269.775	-215.149	-227.966
		-2237.55	-1855.16	-1441.35	-1011.96	-625	-296.936	-91.8579	24.1089	43.0298	45.7764	26.5503	-895.081	-713.501	-537.72	-399.17	-240.173	-114.746	-34.1797	7.93457	13.7329	6.71387	5.49316			178.528	108.032	41.8091	-20.4468	-113.22	-216.675	-302.124	-306.091	-257.263	-260.62	-217.896	162.964	79.0405	12.5122	-63.7817	-134.583	-209.961	-250.854	-257.874	-233.459	-223.999	-209.961
													-433.655	-357.056	-278.015	-188.599	-115.967	-55.2368	-16.7847	1.52588	7.93457	-3.66211	-10.9863			338.745	213.623	90.6372	-28.6865	-149.841	-281.067	-411.987	-483.398	-451.05	-303.955	-267.944	274.048	174.255	79.0405	-11.5967	-111.694	-205.994	-272.217	-256.042	-215.149	-179.138	-176.392
													-1273.19	-1033.63	-787.659	-561.218	-308.228	-117.493	2.44141	43.6401	56.4575	24.7192	11.2915														129.7	72.3267	30.8228	-16.1743	-65.6128	-133.362	-180.969	-179.749	-168.152	-149.231	-136.108
													-531.921	-424.194	-330.811	-214.844	-119.324	-39.3677	3.96728	21.0571	24.7192	30.2124	27.771														122.681	51.5747	-3.05176	-66.2231	-122.07	-178.223	-250.854	-292.053	-296.021	-286.255	-269.47
													-798.34	-657.043	-506.897	-364.075	-226.746	-98.877	-24.4141	1.83106	19.8364	18.3105	19.5312														177.002	106.812	50.354	-14.6484	-91.8579	-191.345	-291.748	-335.083	-286.865	-240.479	-186.768
													-835.266	-676.575	-551.147	-385.742	-253.296	-126.343	-38.7573	10.6812	1.52588	0.610352	-3.66211														79.9561	46.6919	-8.23975	-47.3022	-96.7407	-175.476	-246.277	-350.037	-405.579	-375.366	-284.119
													-497.437	-398.865	-308.228	-206.299	-118.713	-62.2559	-7.93457	13.7329	23.8037	16.7847	74.7681
[truncated: 49 more columns]

## Sheet: Figure 5
	B	Cum Freq Kir2.1															C	Cum Freq Kir2.13														E	p62/actin		F	DARPP32/actin		G	Kir2.1/actin		H	Kir2.3/actin		J	LC3+Kir2.1+ puncta				L
	ctrl							iSPN Atg7cKO									ctrl							iSPN Atg7cKO								ctrl	iSPN Atg7cKO		ctrl	iSPN Atg7cKO		ctrl	iSPN Atg7cKO		ctrl	iSPN Atg7cKO			Veh	BafA1	Atg5KO
puncta/cell	0	5	10	15	20	25	30	0	5	10	15	20	25	30		puncta/cell	0	5	10	15	20	25	30	0	5	10	15	20	25	30		0.0640937	110.122		0.97366	0.811158		0.769032	106.97		0.754389	59.8931			1	25	0
	0.0578035	0.393064	0.728324	0.901734	0.976879	0.99422	1	0.0402299	0.356322	0.689655	0.896552	0.982759	1	1			0	0.233766	0.597403	0.857143	0.961039	1	1	0	0.160494	0.518519	0.888889	0.975309	1	1		1.9219	109.437		1.05823	1.13457		1.92283	19.42		2.04529	21.5529			8	41	0
																																0.356724	194.795		1.04337	0.892018		0.308137	13.8144		0.200322	8.57256			25	5	1
																																1.52436	164.832		0.924741	1.08381		0.32068	48.4424		0.288288	33.7992			6	47	0
																																1.95096	40.5078		1.11172	0.798007		3.35565	7.16838		3.49944	17.4478			9	60	1
																																1.14772	32.896		0.846053	0.818222		0.126931	139.435		0.175403	79.3299			10	38	2
																																0.853164	28.9937		0.899764	0.913784		0.196743	172.018		0.0368715	67.2375			11	59
																																1.24523	25.9874		1.14247	0.5957		0.843528	102.342			69.7901			17	71
																																0.899018	24.0324		1.07779	0.888487		1.51981	154.009			73.1138			11
																																0.424498	16.6238		1.27223	0.536		0.63666							25
																																0.479411	18.6419		0.649979	0.866722									12
																																			0.631418										15
																																			1.07266										10
																																			1.29592										15
																																													14
[truncated: 22 more columns]

## Sheet: Figure 5 - Fig Supp 1
	B	Kir2.1/actin		C	Kir2.3/actin		D	kv1.2/actin		E	PSD95/actin		F	p62/actin		G	DARPP32/actin		I	kv1.2/actin		J	PSD95/actin
	ctrl	dSPN Atg7cKO		ctrl	dSPN Atg7cKO		ctrl	dSPN Atg7cKO		ctrl	dSPN Atg7cKO		ctrl	dSPN Atg7cKO		ctrl	dSPN Atg7cKO		ctrl	iSPN Atg7cKO		ctrl	iSPN Atg7cKO
	0.843528	1.51416		2.12037	1.30626		0.0743907	1.6411		1.14156	0.588541		1.84384	27.6218		0.656458	0.871023		0.967245	0.872825		1.12491	1.12766
	1.51981	1.5155		0.81002	0.959254		0.79555	0.574277		1.38855	0.953139		0.79796	43.9641		1.31805	0.703614		1.06977	0.732678		1.25833	0.874038
	0.63666	1.01626		0.999442	0.878807		0.461603	0.476035		1.16024	1.37714		1.11915	65.7894		0.940709	0.62163		1.30375	1.23021		1.13386	1.12923
	0.384296	1.08542		0.0701714	0.404564		0.346187	1.11108		0.309646	1.25164		0.239049	104.449		0.69416	1.32324		1.16429	1.45206		1.25884	0.961548
	0.587933	1.41763		0.755112	1.22721		0.770356	0.540525		0.789625	1.31439		0.292847	72.714		1.3454	0.945772		1.64686	1.77282		0.870193	0.727431
	1.12947	0.930672		0.919463	1.31369		1.35329	0.785912		1.01903	0.717303		0.965934	29.5739		1.04522			1.23467	1.01481		0.989607	0.929552
	1.3163	0.463645		1.38778	1.22966		1.59117	1.10546		0.949807	0.78439		1.07544	28.4878					0.840449	0.925444		1.2138	0.999338
	1.20596	0.660452		1.55972	0.290149		1.66087	1.45194		1.11898	0.823114		1.36736	44.234					1.39535	0.82478		0.855611	0.947431
	1.10491	1.50581		0.823238	0.764598		1.61103	1.39523		1.0098	0.976727		0.609918	41.09					0.827233	0.851924		1.38702	0.752406
	1.27113	1.05078		0.588803	1.24389		1.33556	1.42212		1.09942	1.06528		2.00387	38.191					0.635632	0.580318		0.762553	0.528256
		0.858331		1.24037				0.609304		1.01334	1.03296		0.684623	49.4673					0.419797	0.712772		0.573532	0.639446
				0.480627							0.61406											0.571752

## Sheet: Figure 5 - Fig Supp 2
	C	Flag-Kir2.1/actin				E	CHX
	Atg5WT	Atg5KO				Atg5WT					Atg5KO
	1.26035	2.85588			Time (min)	0	30	60	180	360	0	30	60	180	360
	0.857754	3.83782				1	1.06579	0.77193	0.45943	0.382675	1	1.28201		1.91045	1.23724
	0.881891	1.96482				1	1.41407	0.752449	0.223508		1	0.242303	0.980366	1.36011	1.1129
						1	1.20912	1.03873	0.717728	0.398451	1	1.11915	0.97926	0.295649
						1	0.449188	0.29981	0.13842	0.170122	1	0.81774	0.968482	0.671414	0.775797
						1	0.697365	0.274859	0.153877		1		1.52893	1.30642
						1	0.758505	0.251831	0.313529	0.05715	1	1.67791	1.39447	0.589008	0.644033

## Sheet: Figure 5 - Fig Supp 3
	C	Snap-tag half life
	Atg7WT		Atg7KO
Time (min)	0	120	0	120
	1.47267	0.222791	0.759558	0.20841
	0.380012	0.115429	1.4584	0.377821
	1.85539	0.317099	0.987869	1.85878
	1.79391	0.142705	0.889555	0.753147
	0.26691	0.143517	1.00243	0.530985
	0.702782	0.284625	0.862824	0.885761
	0.528332		1.03937

## Sheet: Figure 6
	B	Kir2.1 Current Density (pA/pF)									F	RMP (mV)						G	Rheobase (pA)					H	Rin (M𝛺)					I	Control	Kir2 current (pA)
	dSPN				iSPN							iSPN							iSPN						iSPN
	control		Atg7cKO		control		Atg7cKO					control		Atg7cKO					control		Atg7cKO				control		Atg7cKO
	mCh	Kir2.1 GFP	mCh	Kir2.1 GFP	mCh	Kir2.1 GFP	mCh	Kir2.1 GFP				mCh	Atg7	mCh	Atg7				mCh	Atg7	mCh	Atg7			mCh	Atg7	mCh	Atg7			mCh											Atg7
	-32.8624	-28.1938	-35.2331	-27.3008	-31.2468	-35.552	-28.8594	-16.7828				-82.08	-79.13	-73.93	-88.33				170.28	171.52	99.34	190.16			96.639	163.396	451.787	220.108			-50	-60	-70	-80	-90	-100	-110	-120	-130	-140	-150	-50	-60	-70	-80	-90	-100	-110	-120
	-19.0982	-54.7489	-33.9473	-53.7322	-32.6219	-40.455	-18.4114	-15.0523				-82	-80.32	-76.39	-80.26				210	183.5	124.182	187.74			124.105	129.827	382.805	115.585			181.885	139.16	105.896	57.373	-22.8882	-164.185	-396.423	-680.847	-975.342	-1274.11	-1566.77	104.981	102.234	63.7817	10.0708	-55.542	-167.847	-320.74	-494.995
	-18.6444	-25.1138	-20.8184	-26.1301	-25.2254	-43.1133	-26.4699	-20.6799					-78.45	-78.7	-87.05					175.44	124.86	180.7			56.5847	174.967	415.039	146.866			114.136	87.5854	63.1714	31.7383	-25.0244	-128.479	-286.255	-463.257	-665.894	-867.92	-1080.93	143.433	121.765	83.6182	26.5503	-60.73	-198.059	-391.846	-615.54
	-23.4555	-31.9033	-24.99	-45.5528	-19.481	-28.3955	-19.0968	-30.0246				-78.12		-78.05	-83.66				195.9		128	197.28			120.544		359.599	167.974			83.9233	42.4194	10.9863	-23.8037	-56.7627	-130.005	-229.187	-367.737	-530.09	-701.294	-846.863	126.953	90.0269	44.2505	-9.76563	-83.9233	-213.928	-395.508	-612.183
	-34.5909	-27.2693	-13.3475	-69.3693	-22.926	-32.5303	-22.5415	-18.3713				-80.09	-74.95	-85.57	-81.39				247.14	121.22	159.52	182.92			157.674	204.468	367.864	131.607			133.362	98.2666	64.0869	18.6157	-40.8936	-137.939	-268.86	-405.884	-556.03	-708.008	-854.187	51.5747	58.5938	25.3296	-16.4795	-91.5527	-241.699	-426.331	-620.422
	-33.3081	-43.2982	-24.4687	-27.4463	-23.13	-40.6989	-12.6861	-18.2324				-88.12	-81.19	-65.67	-77.87				326.54	187.32	67.14	205.4			112.152	189.59	317.001	102.615			99.4873	76.9043	40.2832	-13.4277	-113.831	-278.32	-490.112	-698.547	-880.737	-1141.97	-1357.73	96.7407	91.5527	59.8145	8.23975	-72.3267	-170.288	-296.936	-428.162
	-27.4792	-23.6966	-21.1689	-26.6815	-25.9115	-33.5183	-21.7411	-17.0233				-86.43	-81.73	-79.71	-79.03				219	161.58	142.36	157.58			175.857	148.773	329.971	148.519			128.174	93.3838	60.1196	17.7002	-59.8145	-171.509	-389.709	-620.117	-845.947	-1094.06	-1355.59	126.343	108.337	77.8198	16.4795	-101.013	-265.503	-477.6	-705.261
	-33.9484	-28.3052	-31.73	-56.8549	-27.6426	-37.8574	-20.8106	-19.491				-74.13	-76.93	-79.88	-82.09				239.6	176.2	99.54	151.26			238.418	108.973	353.05	328.318			103.455	78.4302	50.9644	12.5122	-34.4849	-97.0459	-191.04	-288.696	-408.63	-511.78	-615.234	108.337	102.844	65.0024	-20.4468	-144.348	-351.563	-603.638	-863.342
	-31.3099	-49.9195	-34.191	-49.492	-29.7	-47.96	-13.3475	-24.7511				-82.59		-74.78	-82.4				265.4		112.4	177.06			114.822		421.906	200.399			159.607	146.179	102.844	24.7192	-127.258	-365.295	-672.302	-1017.46	-1351.32	-1676.64	-1999.82	129.089	107.422	58.5938	2.44141	-74.7681	-156.86	-252.991	-350.037
	-19.7482	-27.5889	-26.31	-34.6492		-41	-24.4687	-34.6492				-78.02	-77.79	-77.97	-83.6				208.14	196.4	114.6	183.418			143.433	128.174	451.088	253.296			143.433	111.084	76.9043	3.05176	-107.422	-320.129	-574.951	-865.479	-1181.03	-1473.39	-1747.13	140.381	128.479	91.5527	14.9536	-111.389	-300.903	-538.635	-787.048
	-19.1491	-47.0569	-32.5	-22.8317		-46.78	-21.1689	-16.9342					-83.4	-84.38	-80.23					230.18	95.64	151.6			151.952	105.667	612.45	228.246
	-29.6996	-33.4424	-26.8			-30.02	-20.6	-22.8317				-80.6	-77.16	-84.43	-75.13					191.7		155.28			243.632	112.661		155.004
	-37.8276	-57.9663	-24.33			-39.43	-22	-22				-91.63	-78.57	-85.36*	-87.69				245.68	202.8	80.82	181.8			186.92	161.743	409.317	183.678
		-82.6538				-49.2776	-21.98	-22.87				-83.66	-90.5	-67.67	-80.87				222.2	156.6	119.18	168.34			347.9	101.852	304.031	149.727
							-25.6	-25.76				-87.49	-90.97	-79.97	-82.23				292.8	240.72					159.836	99.1821		183.678
							-25.18	-23.54				-83.86	-88.87						255.8	255.48					178.528	172.17		149.727
							-11.3133	-18.53				-87.77	-86.52						170.84	208.2					169.5	125.758
							-23					-80.22	-72.25						247.6	228.86					219.218	141.017
												-75.8	-80						192.34	174.56						103.633
												-92.68	-79.93						164.36	196.7					100.581	111.771
												-84.17	-80.96						220.86	188.68					120.672	146.484
												-77.58	-72.24						205.58	171.76					118.129	172.424
												-76.46	-83.66						176.4	162.4					145.467	107.32
												-87.77	-81.15						179.44	237.2					232.696	154.495
												-90.29	-80.8						176.12	183					158.946	146.23
												-83.32	-78.45						138.2	193.4					201.035	153.732
												-83.01	-81.41						235.3	189.34						161.234
													-79.86						234.4	169.34						288.391
																				131.48
[truncated: 25 more columns]

[truncated: 4 more sheets: Figure 7, Figure 7 - Fig Supp 1, Figure 8, Figure 8 - Fig Supp 1]
